# Supplementary material for: A Way to Increase the Bioaccesibility and Photostability of Roflumilast, a COPD Treatment, by Cyclodextrin Monomers
Source: MDPI journal article supplement (doi:10.3390/polym11050801), 2019-05-04
Supplement: s1 [file s1]

# Supplementary Information

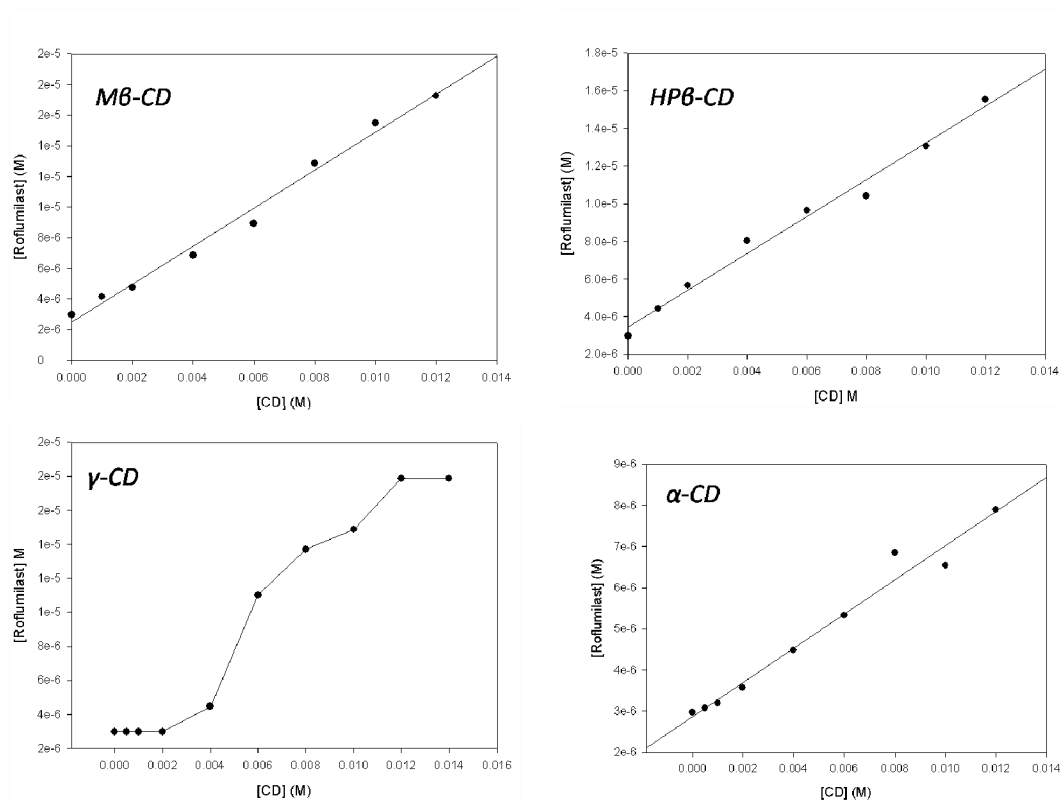

Figure S1. Effect of different CDs on Roflumilast solubility (25 °C pH 7).

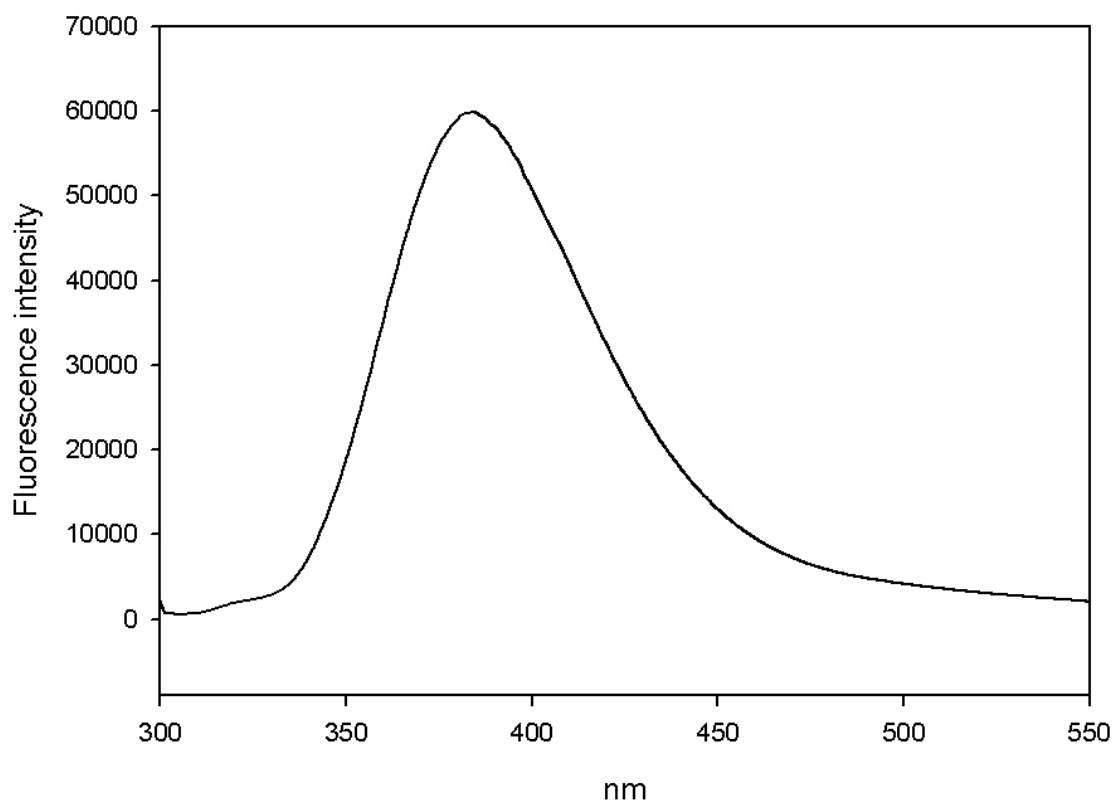

Figure S2. Emission spectrum of roflumilast 8  $\mu$ M 4% EtOH at pH 7.4 (excitation 290).

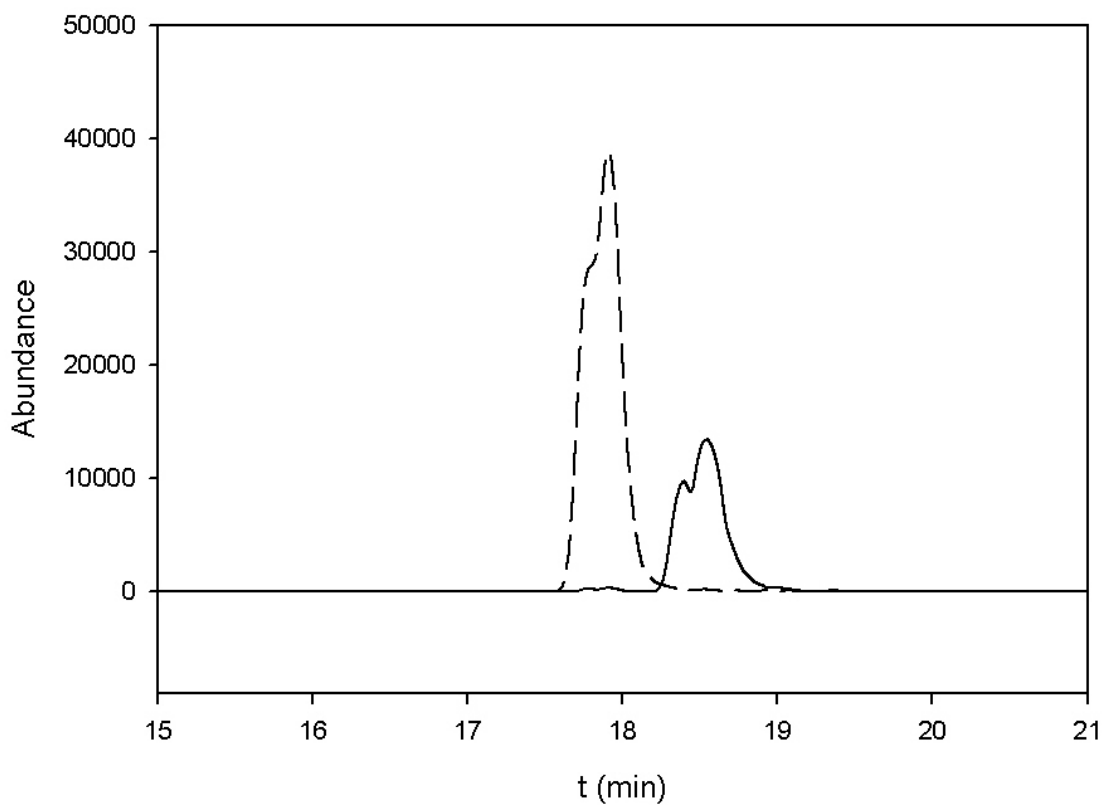

Figure S3. HPLC-MS peaks for Roflumilast (403.0428 ion, - - -) and Roflumilast without Cl (367.0661ion, \_).

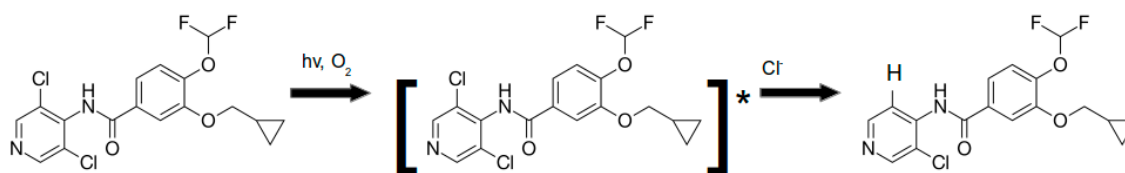

Figure S4. Plausible simplified reaction mechanism.
